# Supplementary material for: Crown-like structures in breast adipose tissue of breast cancer patients: associations with CD68 expression, obesity, metabolic factors and prognosis
Source: PubMed Central journal article supplement (PMC8298396; doi:10.1038/s41523-021-00304-x), 2021-07-22
Supplement: 41523_2021_304_MOESM1_ESM.pdf [file 41523_2021_304_MOESM1_ESM.pdf]

**Supplementary Table 1. Comparison of patient and tumour characteristics according to paraffin block availability.**

|                                 | <b>Paraffin blocks Available<br/>n=119</b> | <b>Paraffin blocks Not Available<sup>[1]</sup><br/>n=44</b> | <b>P<sup>[2]</sup></b> |
|---------------------------------|--------------------------------------------|-------------------------------------------------------------|------------------------|
| <b>Age at diagnosis</b>         |                                            |                                                             | 0.4                    |
| ≤ 60                            | 84 (70.6%)                                 | 34 (77.3%)                                                  |                        |
| > 60                            | 35 (29.4%)                                 | 10 (22.7%)                                                  |                        |
| <b>Menopausal Status</b>        |                                            |                                                             | 0.06                   |
| Pre- or Peri-                   | 56 (47.1%)                                 | 28 (63.6%)                                                  |                        |
| Post                            | 63 (52.9%)                                 | 16 (36.4%)                                                  |                        |
| <b>BMI (kg/m<sup>2</sup>)</b>   |                                            |                                                             | 0.37                   |
| ≤ 25                            | 61 (51.3%)                                 | 28 (63.6%)                                                  |                        |
| > 25-30                         | 37 (31.1%)                                 | 10 (22.7%)                                                  |                        |
| > 30                            | 21 (17.6%)                                 | 6 (13.6%)                                                   |                        |
| <b>Surgical Treatment</b>       |                                            |                                                             | 0.37                   |
| Total Mastectomy                | 27 (22.7%)                                 | 13 (29.5%)                                                  |                        |
| Partial Mastectomy              | 92 (77.3%)                                 | 31 (70.5%)                                                  |                        |
| <b>Tumor Grade (Nottingham)</b> |                                            |                                                             | 0.75                   |
| Grade 1                         | 31 (26.1%)                                 | 12 (27.3%)                                                  |                        |
| Grade 2                         | 44 (37%)                                   | 19 (43.2%)                                                  |                        |
| Grade 3                         | 40 (33.6%)                                 | 11 (25%)                                                    |                        |
| Unknown                         | 4 (3.4%)                                   | 2 (4.5%)                                                    |                        |
| <b>Tumor Stage</b>              |                                            |                                                             | 0.96                   |
| pT1                             | 69 (58%)                                   | 25 (56.8%)                                                  |                        |
| pT2                             | 36 (30.3%)                                 | 13 (29.5%)                                                  |                        |
| pT3                             | 8 (6.7%)                                   | 4 (9.1%)                                                    |                        |
| Unknown                         | 6 (5%)                                     | 2 (4.5%)                                                    |                        |
| <b>Nodal Stage</b>              |                                            |                                                             | 0.99                   |
| pN0                             | 81 (68.1%)                                 | 30 (68.2%)                                                  |                        |
| pN1-3                           | 38 (31.9%)                                 | 14 (31.8%)                                                  |                        |
| <b>Hormone Receptor</b>         |                                            |                                                             | 0.27                   |
| Positive                        | 88 (73.9%)                                 | 33 (75%)                                                    |                        |
| Negative                        | 11 (9.2%)                                  | 7 (15.9%)                                                   |                        |
| Unknown                         | 20 (16.8%)                                 | 4 (9.1%)                                                    |                        |
| <b>Lymphovascular Invasion</b>  |                                            |                                                             | 0.85                   |
| Present                         | 22 (18.5%)                                 | 9 (20.5%)                                                   |                        |
| Absent                          | 60 (50.4%)                                 | 20 (45.5%)                                                  |                        |
| Unknown                         | 37 (31.1%)                                 | 15 (34.1%)                                                  |                        |

1. Paraffin blocks were needed in order to do CD68 staining.

2. P-value from testing the null hypothesis of no association, using  $\chi^2$  tests.
