# Supplementary material for: Crown-like structures in breast adipose tissue of breast cancer patients: associations with CD68 expression, obesity, metabolic factors and prognosis
Source: PubMed Central journal article supplement (PMC8298396; doi:10.1038/s41523-021-00304-x), 2021-07-22
Supplement: 41523_2021_304_MOESM2_ESM.pdf [file 41523_2021_304_MOESM2_ESM.pdf]

## Reporting Summary

Nature Research wishes to improve the reproducibility of the work that we publish. This form provides structure for consistency and transparency in reporting. For further information on Nature Research policies, see our [Editorial Policies](#) and the [Editorial Policy Checklist](#).

### Statistics

For all statistical analyses, confirm that the following items are present in the figure legend, table legend, main text, or Methods section.

- | n/a                                 | Confirmed                                                                                                                                                                                                                                                                                      |
|-------------------------------------|------------------------------------------------------------------------------------------------------------------------------------------------------------------------------------------------------------------------------------------------------------------------------------------------|
| <input type="checkbox"/>            | <input checked="" type="checkbox"/> The exact sample size ( $n$ ) for each experimental group/condition, given as a discrete number and unit of measurement                                                                                                                                    |
| <input checked="" type="checkbox"/> | <input type="checkbox"/> A statement on whether measurements were taken from distinct samples or whether the same sample was measured repeatedly                                                                                                                                               |
| <input type="checkbox"/>            | <input checked="" type="checkbox"/> The statistical test(s) used AND whether they are one- or two-sided<br><i>Only common tests should be described solely by name; describe more complex techniques in the Methods section.</i>                                                               |
| <input type="checkbox"/>            | <input checked="" type="checkbox"/> A description of all covariates tested                                                                                                                                                                                                                     |
| <input type="checkbox"/>            | <input checked="" type="checkbox"/> A description of any assumptions or corrections, such as tests of normality and adjustment for multiple comparisons                                                                                                                                        |
| <input type="checkbox"/>            | <input checked="" type="checkbox"/> A full description of the statistical parameters including central tendency (e.g. means) or other basic estimates (e.g. regression coefficient) AND variation (e.g. standard deviation) or associated estimates of uncertainty (e.g. confidence intervals) |
| <input type="checkbox"/>            | <input checked="" type="checkbox"/> For null hypothesis testing, the test statistic (e.g. $F$ , $t$ , $r$ ) with confidence intervals, effect sizes, degrees of freedom and $P$ value noted<br><i>Give <math>P</math> values as exact values whenever suitable.</i>                            |
| <input checked="" type="checkbox"/> | <input type="checkbox"/> For Bayesian analysis, information on the choice of priors and Markov chain Monte Carlo settings                                                                                                                                                                      |
| <input checked="" type="checkbox"/> | <input type="checkbox"/> For hierarchical and complex designs, identification of the appropriate level for tests and full reporting of outcomes                                                                                                                                                |
| <input checked="" type="checkbox"/> | <input type="checkbox"/> Estimates of effect sizes (e.g. Cohen's $d$ , Pearson's $r$ ), indicating how they were calculated                                                                                                                                                                    |

*Our web collection on [statistics for biologists](#) contains articles on many of the points above.*

### Software and code

Policy information about [availability of computer code](#)

**Data collection** Baseline data collection started in 1989 using a SIR (public access) database; data were transferred to SAS (SAS Institute) 6.12 in 1999. Follow-up data was collected in a Microsoft Access 97 database. Data were transferred to updated versions of the software as these became available. There was no use of non-standard features or custom code.

**Data analysis** Data analysed with the assistance of Microsoft Excel 2010-2016, SAS (SAS Institute) 9.2 and S-PLUS (Tibco) 6.2. There was no use of non-standard features or custom code.

For manuscripts utilizing custom algorithms or software that are central to the research but not yet described in published literature, software must be made available to editors and reviewers. We strongly encourage code deposition in a community repository (e.g. GitHub). See the Nature Research [guidelines for submitting code & software](#) for further information.

### Data

Policy information about [availability of data](#)

All manuscripts must include a [data availability statement](#). This statement should provide the following information, where applicable:

- Accession codes, unique identifiers, or web links for publicly available datasets
- A list of figures that have associated raw data
- A description of any restrictions on data availability

The datasets generated during and/or analysed during the current study are available from the corresponding author on reasonable request.

## Field-specific reporting

Please select the one below that is the best fit for your research. If you are not sure, read the appropriate sections before making your selection.

Life sciences  Behavioural & social sciences  Ecological, evolutionary & environmental sciences

For a reference copy of the document with all sections, see [nature.com/documents/nr-reporting-summary-flat.pdf](https://www.nature.com/documents/nr-reporting-summary-flat.pdf)

## Life sciences study design

All studies must disclose on these points even when the disclosure is negative.

|                 |                                                                                                                                                                                          |
|-----------------|------------------------------------------------------------------------------------------------------------------------------------------------------------------------------------------|
| Sample size     | Determined from availability of tissue samples from a legacy cohort. No additional prospective sample size determinations were needed.                                                   |
| Data exclusions | No data were excluded from the analysis                                                                                                                                                  |
| Replication     | Interobserver replicability was addressed by consensus review by the study pathologists. Replication of CD68 antibody staining was assured by control staining on an automated platform. |
| Randomization   | The clinical data were obtained using a prospective cohort method, without a need for random allocation.                                                                                 |
| Blinding        | Investigators were blinded to cohort characteristics when analysing the data under investigation in this manuscript.                                                                     |

## Reporting for specific materials, systems and methods

We require information from authors about some types of materials, experimental systems and methods used in many studies. Here, indicate whether each material, system or method listed is relevant to your study. If you are not sure if a list item applies to your research, read the appropriate section before selecting a response.

### Materials & experimental systems

| n/a                                 | Involvement in the study                                        |
|-------------------------------------|-----------------------------------------------------------------|
| <input type="checkbox"/>            | <input checked="" type="checkbox"/> Antibodies                  |
| <input checked="" type="checkbox"/> | <input type="checkbox"/> Eukaryotic cell lines                  |
| <input checked="" type="checkbox"/> | <input type="checkbox"/> Palaeontology and archaeology          |
| <input checked="" type="checkbox"/> | <input type="checkbox"/> Animals and other organisms            |
| <input type="checkbox"/>            | <input checked="" type="checkbox"/> Human research participants |
| <input type="checkbox"/>            | <input checked="" type="checkbox"/> Clinical data               |
| <input checked="" type="checkbox"/> | <input type="checkbox"/> Dual use research of concern           |

### Methods

| n/a                                 | Involvement in the study                        |
|-------------------------------------|-------------------------------------------------|
| <input checked="" type="checkbox"/> | <input type="checkbox"/> ChIP-seq               |
| <input checked="" type="checkbox"/> | <input type="checkbox"/> Flow cytometry         |
| <input checked="" type="checkbox"/> | <input type="checkbox"/> MRI-based neuroimaging |

## Antibodies

|                 |                                                                                                                                                                                                          |
|-----------------|----------------------------------------------------------------------------------------------------------------------------------------------------------------------------------------------------------|
| Antibodies used | CD68 (immunohistochemistry, clone PG-M1, Dako Canada, Catalog No. M0876, Multiple lots).                                                                                                                 |
| Validation      | This is a Health Canada approved in vitro diagnostic, validated on control human tissues containing macrophages (at least 20 cases with any change in protocol) in a CLIA certified clinical laboratory. |

## Human research participants

Policy information about [studies involving human research participants](#)

|                            |                                                                                                                                                                                                                                                                                                                                                                                                                                                                                                                                                                                                                   |
|----------------------------|-------------------------------------------------------------------------------------------------------------------------------------------------------------------------------------------------------------------------------------------------------------------------------------------------------------------------------------------------------------------------------------------------------------------------------------------------------------------------------------------------------------------------------------------------------------------------------------------------------------------|
| Population characteristics | The population comprised a consecutive cohort of women who underwent treatment for operable breast cancer at Mount Sinai Hospital (Toronto, Canada) between June 1989 and June 1996. Women were included if they had age less than 75 years, complete resection of breast cancer and axillary dissection for previously untreated breast cancer. Women were excluded if they had prior malignancy (except cervical in situ lesion or nonmelanoma skin cancer), a serious coexisting medical condition, including diabetes, use of medications that modified key study variables, or inability to provide consent. |
| Recruitment                | Consecutive women were recruited from those women undergoing surgery for breast cancer (see above). Women were excluded if they had prior malignancy (except cervical in situ lesion or nonmelanoma skin cancer), a serious coexisting medical condition, including diabetes, use of medications that modified key study variables, or inability to provide consent. No systematic source of bias was identified.                                                                                                                                                                                                 |
| Ethics oversight           | Mount Sinai Hospital, Toronto, Canada, Research Ethics Board                                                                                                                                                                                                                                                                                                                                                                                                                                                                                                                                                      |

Note that full information on the approval of the study protocol must also be provided in the manuscript.

## Clinical data

---

Policy information about [clinical studies](#)

All manuscripts should comply with the ICMJE [guidelines for publication of clinical research](#) and a completed [CONSORT checklist](#) must be included with all submissions.

|                             |                                                                                                                                                                                      |
|-----------------------------|--------------------------------------------------------------------------------------------------------------------------------------------------------------------------------------|
| Clinical trial registration | This was a prospective observational trial. The enrollment completed in 1996. Therefore, no clinical trials registration was required or obtained.                                   |
| Study protocol              | The original study protocol was published in 2002. (PMID: 11773152)                                                                                                                  |
| Data collection             | The population comprised a consecutive cohort of women who underwent treatment for operable breast cancer at Mount Sinai Hospital (Toronto, Canada) between June 1989 and June 1996. |
| Outcomes                    | Overall survival and Disease-free survival (breast cancer) were the primary outcomes, obtained by patient follow-up.                                                                 |
